# Supplementary material for: Association between Melanocytic Nevi and Risk of Breast Diseases: The French E3N Prospective Cohort
Source: PLoS Med. 2014 Jun 10;11(6):e1001660. doi: 10.1371/journal.pmed.1001660 (PMC4051602; doi:10.1371/journal.pmed.1001660)
Supplement: Table S3 — Hazard ratios and 95% confidence intervals for number of nevi (in four categories, considering “a few” as the reference) in relation to the risk of breast cancer, E3N cohort ( n = 89,802). (DOCX) [file pmed.1001660.s003.docx]

| **Table S3.** Hazard Ratios (HRs) and 95% Confidence Intervals (CIs) for number of nevi in relation to the risk of breast cancer, E3N cohort (n=89,802) | | | | | | | |
| --- | --- | --- | --- | --- | --- | --- | --- |
| **Number of nevi** | **n** | **Cases** | **Model 1**  **Age-adjusted HR**  **(95% CI)** | **Model 2**  **Multivariable HRa**  **(95% CI)** | **Model 3**  **Multivariable HRb**  **(95% CI)** | **Model 4**  **Multivariable HRc**  **(95% CI)** | **Model 5**  **Multivariable HRd**  **(95% CI)** |
| ***All breast cancers*** | | | | | | | |
| None | 9044 | 579 | 0.96 (0.88-1.06) | 0.98 (0.89-1.07) | 0.99 (0.90-1.08) | 0.99 (0.91-1.09) | 0.99 (0.91-1.09) |
| A few | 33,187 | 2194 | 1.00 (Reference) | 1.00 (Reference) | 1.00 (Reference) | 1.00 (Reference) | 1.00 (Reference) |
| Many | 37,911 | 2502 | 1.02 (0.97-1.08) | 1.01 (0.96-1.07) | 1.01 (0.95-1.07) | 1.01 (0.95-1.07) | 1.00 (0.95-1.06) |
| Very many | 9660 | 681 | 1.13 (1.04-1.23) | 1.11 (1.02-1.21) | 1.09 (1.00-1.19) | 1.08 (0.99-1.18) | 1.07 (0.98-1.17) |
| Ptrend |  |  | 0.006 | 0.04 | 0.12 | 0.15 | 0.26 |
| ***In situ breast cancers*** | | | | | | | |
| None | 9044 | 61 | 0.88 (0.67-1.17) | 0.90 (0.68-1.20) | 0.91 (0.69-1.21) | 0.92 (0.69-1.22) | 0.92 (0.69-1.22) |
| A few | 33,187 | 258 | 1.00 (Reference) | 1.00 (Reference) | 1.00 (Reference) | 1.00 (Reference) | 1.00 (Reference) |
| Many | 37,911 | 297 | 1.02 (0.86-1.20) | 1.00 (0.85-1.18) | 0.99 (0.84-1.18) | 0.99 (0.84-1.18) | 0.99 (0.84-1.18) |
| Very many | 9660 | 95 | 1.30 (1.03-1.65) | 1.26 (0.99-1.60) | 1.23 (0.97-1.57) | 1.23 (0.97-1.56) | 1.22 (0.96-1.54) |
| Ptrend |  |  | 0.03 | 0.08 | 0.12 | 0.13 | 0.15 |
| ***Invasive breast cancers*** | | | | | | | |
| None | 9044 | 518 | 0.97 (0.89-1.07) | 0.99 (0.90-1.09) | 1.00 (0.90-1.10) | 1.00 (0.91-1.11) | 1.00 (0.91-1.10) |
| A few | 33,187 | 1936 | 1.00 (Reference) | 1.00 (Reference) | 1.00 (Reference) | 1.00 (Reference) | 1.00 (Reference) |
| Many | 37,911 | 2205 | 1.02 (0.96-1.09) | 1.01 (0.96-1.08) | 1.01 (0.95-1.07) | 1.01 (0.95-1.07) | 1.00 (0.94-1.07) |
| Very many | 9660 | 586 | 1.11 (1.01-1.21) | 1.09 (0.99-1.19) | 1.06 (0.97-1.17) | 1.06 (0.97-1.17) | 1.05 (0.95-1.15) |
| Ptrend |  |  | 0.04 | 0.11 | 0.27 | 0.33 | 0.51 |

aAdjusted for education, menopausal status, age at menopause (in postmenopausal women), use of menopausal hormone therapy (in postmenopausal women), use of premenopausal progestagens and stratified according to year of birth in 5-year categories

bAdditionally adjusted for personal history of benign breast disease

cAdditionally adjusted for family history of breast cancer

dAdditionally adjusted for BMI, height, physical activity, age at menarche, age at first full-term pregnancy, parity, breastfeeding, use of oral contraceptives, history of mammographic exam, UV dose in county of birth and UV dose in county of residence at inclusion
